# Supplementary material for: Recent advances in VAT photopolymerization additive manufacturing of battery electrodes: towards high-resolution 3D-printed batteries
Source: Royal Society of Chemistry journal article supplement (doi:10.1039/d6sc01385f), 2026-05-08
Supplement: d6sc01385f1.pdf [file d6sc01385f1.pdf]

## Appendix I. References for Figure 8

The following references correspond to the studies summarized in Figure 8.

- 1 H. Wang, W. Bai, H. Wang, D. Kong, T. Xu, Z. Zhang, J. Zang, X. Wang, S. Zhang, Y. Tian, X. Li, C.-S. Lee and Y. Wang, 3D printed Au/rGO microlattice host for dendrite-free sodium metal anode, *Energy Storage Materials*, 2023, 55, 631–641.
- 2 C. Shen, T. Wang, X. Xu and X. Tian, 3D printed cellular cathodes with hierarchical pores and high mass loading for Li–SeS<sub>2</sub> battery, *Electrochimica Acta*, 2020, 349, 136331.
- 3 D. Kong, Y. Wang, S. Huang, B. Zhang, Y. V. Lim, G. J. Sim, P. Valdivia y Alvarado, Q. Ge and H. Y. Yang 3D Printed Compressible Quasi-Solid-State Nickel–Iron Battery, *ACS Nano*, 2020, 14, 9675–9686.
- 4 H. Liu, X. Li, Q. Li, X. Liu, F. Chen and G. Zhang, 3D printed freestanding ZnSe/NC anodes for Li-ion microbatteries, *New Carbon Materials*, 2022, 37, 956–967.
- 5 C. Chen, J. Jiang, W. He, W. Lei, Q. Hao and X. Zhang, 3D Printed High-Loading Lithium-Sulfur Battery Toward Wearable Energy Storage, *Advanced Functional Materials*, 2020, 30, 1909469.
- 6 D. Ji, H. Zheng, H. Zhang, W. Liu and J. Ding, 3D printed high-performance sodium ion and zinc ion full batteries, *Journal of Alloys and Compounds*, 2022, 900, 163394.
- 7 L. Xue, L. Zeng, W. Kang, H. Chen, Y. Hu, Y. Li, W. Chen, T. Lei, Y. Yan, C. Yang, A. Hu, X. Wang, J. Xiong and C. Zhang, 3D Printed Li–S Batteries with In Situ Decorated Li<sub>2</sub>S/C Cathode: Interface Engineering Induced Loading-Insensitivity for Scaled Areal Performance, *Advanced Energy Materials*, 2021, 11, 2100420.
- 8 M. Idrees, S. Batool, J. Cao, M. S. Javed, S. Xiong, C. Liu and Z. Chen, 3D printed PC/SiOC@Zn hybrid composite as dendrite-free anode for Zn-Ion battery, *Nano Energy*, 2022, 100, 107505.
- 9 J. Fu, D. Wang, Y. Li, X. Liu, R. Zhang, Z. Liu, P. Liu, L. Zhang, X. Li and G. Wen, 3D printed silicon-based micro-lattices with ultrahigh areal/gravimetric capacities and robust structural stability for lithium-ion batteries, *Nano Res.*, 2024, 17, 2693–2703.
- 10 H. Beydaghi, S. Abouali, S. B. Thorat, A. E. D. R. Castillo, S. Bellani, S. Lauciello, S. Gentiluomo, V. Pellegrini and F. Bonaccorso, 3D printed silicon-few layer graphene anode for advanced Li-ion batteries, *RSC Advances*, 2021, 11, 35051–35060.
- 11 Z. He, T. Han, W. Liu, C. Zhou, J. Sun, J. Zhou and Y. Li, 3D Printed Sodium-Ion Batteries via Ternary Anode Design Affording Hybrid Ion Storage Mechanism, *Advanced Energy Materials*, 2024, 14, 2303296.
- 12 G. Zhou, M.-C. Li, C. Liu, Q. Wu and C. Mei, 3D Printed Ti<sub>3</sub>C<sub>2</sub>T<sub>x</sub> MXene/Cellulose Nanofiber Architectures for Solid-State Supercapacitors: Ink Rheology, 3D Printability, and Electrochemical Performance, *Advanced Functional Materials*, 2022, 32, 2109593.
- 13 A. Maurel, A. C. Martinez, S. B. Chavari, B. Yelamanchi, M.-L. Seol, D. A. Dornbusch, W. H. Huddleston, S. T. Sreenivasan, C. G. Sherrard, E. MacDonald and P. Cortes, 3D Printed TiO<sub>2</sub> Negative Electrodes for Sodium-Ion and Lithium-Ion Batteries Using Vat Photopolymerization, *J. Electrochem. Soc.*, 2023, 170, 100538.
- 14 L. Zeng, H. He, H. Chen, D. Luo, J. He and C. Zhang, 3D Printing Architecting Reservoir-Integrated Anode for Dendrite-Free, Safe, and Durable Zn Batteries, *Advanced Energy Materials*, 2022, 12, 2103708.
- 15 H. Chen, J. Liu, W. Cao, H. He, X. Li and C. Zhang, 3D printing CO<sub>2</sub>-activated carbon nanotubes host to promote sulfur loading for high areal capacity lithium-sulfur batteries, *Nano Res.*, 2023, 16, 8281–8289.
- 16 K. Shen, Z. Cao, Y. Shi, Y. Zhang, B. Li and S. Yang, 3D Printing Lithium Salt towards Dendrite-free Lithium Anodes, *Energy Storage Materials*, 2021, 35, 108–113.

- 17 C. Sun, S. Liu, X. Shi, C. Lai, J. Liang and Y. Chen, 3D printing nanocomposite gel-based thick electrode enabling both high areal capacity and rate performance for lithium-ion battery, *Chemical Engineering Journal*, 2020, 381, 122641.
- 18 J. Cai, J. Jin, Z. Fan, C. Li, Z. Shi, J. Sun and Z. Liu, 3D Printing of a V8C7–VO<sub>2</sub> Bifunctional Scaffold as an Effective Polysulfide Immobilizer and Lithium Stabilizer for Li–S Batteries, *Advanced Materials*, 2020, 32, 2005967.
- 19 D. Cipollone, H. Yang, F. Yang, J. Bright, B. Liu, N. Winch, N. Wu and K. A. Sierros, 3D printing of an anode scaffold for lithium batteries guided by mixture design-based sequential learning, *Journal of Materials Processing Technology*, 2021, 295, 117159.
- 20 M. Zhang, T. Hu, P. Chang, Z. Jin, H. Mei, N. Dong and L. Cheng, 3D printing of CuO/Cu@Mullite electrodes with macroporous structures and their strong regulation on zinc ion storage, *Ceramics International*, 2022, 48, 4124–4133.
- 21 H. He, D. Luo, L. Zeng, J. He, X. Li, H. Yu and C. Zhang, 3D printing of fast kinetics reconciled ultra-thick cathodes for high areal energy density aqueous Li–Zn hybrid battery, *Science Bulletin*, 2022, 67, 1253–1263.
- 22 X. Lin, J. Wang, X. Gao, S. Wang, Q. Sun, J. Luo, C. Zhao, Y. Zhao, X. Yang, C. Wang, R. Li and X. Sun, 3D Printing of Free-Standing “O<sub>2</sub> Breathable” Air Electrodes for High-Capacity and Long-Life Na–O<sub>2</sub> Batteries, *Chem. Mater.*, 2020, 32, 3018–3027.
- 23 T. Han, Z. He, W. Kuang, J. Zhou and Y. Li, 3D printing of porous hollow nanosphere MoS<sub>2</sub>@NiS/rGO scaffolds empowering long-cycle sodium-ion batteries, *Nano Energy*, 2024, 128, 109953.
- 24 Z. Fan, C. Wei, L. Yu, Z. Xia, J. Cai, Z. Tian, G. Zou, S. X. Dou and J. Sun, 3D Printing of Porous Nitrogen-Doped Ti<sub>3</sub>C<sub>2</sub> MXene Scaffolds for High-Performance Sodium-Ion Hybrid Capacitors, *ACS Nano*, 2020, 14, 867–876.
- 25 H. Ma, X. Tian, J. Fan, W. Cao, X. Yuan, S. Hou and H. Jin, 3D printing of solid-state zinc-ion microbatteries with ultrahigh capacity and high reversibility for wearable integration design, *Journal of Power Sources*, 2022, 550, 232152.
- 26 K. Xu, N. Zhao, Y. Li, P. Wang, Z. Liu, Z. Chen, J. Shen and C. Liu, 3D printing of ultrathick natural graphite anodes for high-performance interdigitated three-dimensional lithium-ion batteries, *Electrochemistry Communications*, 2022, 139, 107312.
- 27 X. Gao, X. Yang, K. Adair, X. Li, J. Liang, Q. Sun, Y. Zhao, R. Li, T.-K. Sham and X. Sun, 3D Vertically Aligned Li Metal Anodes with Ultrahigh Cycling Currents and Capacities of 10 mA cm<sup>-2</sup>/20 mAh cm<sup>-2</sup> Realized by Selective Nucleation within Microchannel Walls, *Advanced Energy Materials*, 2020, 10, 1903753.
- 28 Z. Lyu, G. J. H. Lim, R. Guo, Z. Pan, X. Zhang, H. Zhang, Z. He, S. Adams, W. Chen, J. Ding and J. Wang, 3D-printed electrodes for lithium metal batteries with high areal capacity and high-rate capability, *Energy Storage Materials*, 2020, 24, 336–342.
- 29 A. Stephen, S. Bhoyate, P. Cao, R. Advincula, N. Dahotre, Y. Jiang and W. Choi, 3D-printed flexible anode for high-performance zinc ion battery, *MRS Communications*, 2022, 12, 894–901.
- 30 Y. Qiao, Y. Liu, C. Chen, H. Xie, Y. Yao, S. He, W. Ping, B. Liu and L. Hu, 3D-Printed Graphene Oxide Framework with Thermal Shock Synthesized Nanoparticles for Li-CO<sub>2</sub> Batteries, *Advanced Functional Materials*, 2018, 28, 1805899.
- 31 C. Gao, X. Cui, C. Wang, M. Wang, S. Wu, Y. Quan, P. Wang, D. Zhao and S. Li, 3D-printed hierarchical porous and multidimensional conductive network based on conducting polymer/graphene oxide, *Journal of Materiomics*, 2024, 10, 234–244.
- 32 Y. Bao, Y. Liu, Y. Kuang, D. Fang and T. Li, 3D-printed highly deformable electrodes for flexible lithium ion batteries, *Energy Storage Materials*, 2020, 33, 55–61.
- 33 H. Shi, M. Pei, S. Wang, F. Yao, Y. Xia, Z. Xu, S. Liu, R. Shao, W. Wang and S. Liang, 3D-Printed Periodic Hierarchical Porous rGO/Ti<sub>3</sub>C<sub>2</sub>Tx Architectures Induced Uniform Lithium Deposition for Li Metal Anodes, *Advanced Materials Technologies*, 2023, 8, 2200256.

- 34 Y. Yang, L. Ai, S. Yu, J. He, T. Xu, D. Chen and L. Shen, 3D-Printed Porous GO Framework Enabling Dendrite-Free Lithium-Metal Anodes, *ACS Appl. Energy Mater.*, 2022, 5, 15666–15672.
- 35 S. Praveen, G. S. Sim, N. Shaji, M. Nanthagopal and C. W. Lee, 3D-printed self-standing electrodes for flexible Li-ion batteries, *Applied Materials Today*, 2022, 26, 100980.
- 36 Z. Wang, Z. Huang, H. Wang, W. Li, B. Wang, J. Xu, T. Xu, J. Zang, D. Kong, X. Li, H. Y. Yang and Y. Wang, 3D-Printed Sodiophilic V2CTx/rGO-CNT MXene Microgrid Aerogel for Stable Na Metal Anode with High Areal Capacity, *ACS Nano*, 2022, 16, 9105–9116.
- 37 B. Yao, S. Chandrasekaran, H. Zhang, A. Ma, J. Kang, L. Zhang, X. Lu, F. Qian, C. Zhu, E. B. Duoss, C. M. Spadaccini, M. A. Worsley and Y. Li, 3D-Printed Structure Boosts the Kinetics and Intrinsic Capacitance of Pseudocapacitive Graphene Aerogels, *Advanced Materials*, 2020, 32, 1906652.
- 38 X. Hu, Y. Chen, W. Xu, Y. Zhu, D. Kim, Y. Fan, B. Yu and Y. Chen, 3D-Printed Thermoplastic Polyurethane Electrodes for Customizable, Flexible Lithium-Ion Batteries with an Ultra-Long Lifetime, *Small*, 2023, 19, 2301604.
- 39 X. Hu, Y. Zhu, Y.-F. Fu, Y. Fan, Y. Chen, D. Kim, X. Lu, B. Yu and Y. I. Chen, 3D-printed topological-structured electrodes with exceptional mechanical properties for high-performance flexible Li-ion batteries, *Energy Storage Materials*, 2024, 70, 103560.
- 40 S. Praveen, G. S. Sim, C. W. Ho and C. W. Lee, 3D-printed twisted yarn-type Li-ion battery towards smart fabrics, *Energy Storage Materials*, 2021, 41, 748–757.
- 41 Z. Fan, J. Jin, C. Li, J. Cai, C. Wei, Y. Shao, G. Zou and J. Sun, 3D-Printed Zn-Ion Hybrid Capacitor Enabled by Universal Divalent Cation-Gelated Additive-Free Ti3C2 MXene Ink, *ACS Nano*, 2021, 15, 3098–3107.
- 42 W. Bai, H. Wang, D. H. Min, J. Miao, B. Li, T. Xu, D. Kong, X. Li, X. Yu, Y. Wang and H. S. Park, 3D-Printed Hierarchically Microgrid Frameworks of Sodiophilic Co3O4@C/rGO Nanosheets for Ultralong Cyclic Sodium Metal Batteries, *Adv Sci (Weinh)*, 2024, 11, 2404419.
- 43 W. Xi, J. Zhang, Y. Zhang, R. Wang, Y. Gong, B. He, H. Wang and J. Jin, A 3D-printed Al metal-organic framework/S cathode with efficient adsorption and redox conversion of polysulfides in lithium-sulfur batteries, *J. Mater. Chem. A*, 2023, 11, 7679–7689.
- 44 Y. Katsuyama, A. Kudo, H. Kobayashi, J. Han, M. Chen, I. Honma and R. B. Kaner, A 3D-Printed, Freestanding Carbon Lattice for Sodium Ion Batteries, *Small*, 2022, 18, 2202277.
- 45 R. Tao, Y. Gu, J. Sharma, K. Hong and J. Li, A conformal heat-drying direct ink writing 3D printing for high-performance lithium-ion batteries, *Materials Today Chemistry*, 2023, 32, 101672.
- 46 F. Elizalde, S. Trano, J. Ayestarán, X. L. de Pariza, R. Aguirresarobe, C. Francia, D. Mecerreyes, H. Sardon and F. Bella, A Light-Mediated, 3D-Printable, and Self-Healable Polymer Electrolyte for Lithium Batteries, *Advanced Functional Materials*, 2025, 35, 2419034.
- 47 G. Shi, X. Peng, J. Zeng, L. Zhong, Y. Sun, W. Yang, Y. L. Zhong, Y. Zhu, R. Zou, S. Admassie, Z. Liu, C. Liu, E. I. Iwuoha and J. Lu, A Liquid Metal Microdroplets Initialized Hemicellulose Composite for 3D Printing Anode Host in Zn-Ion Battery, *Advanced Materials*, 2023, 35, 2300109.
- 48 C. Shi, W. Xi, Y. Zhang, J. Zhang, R. Wang, Y. Gong, B. He, H. Wang and J. Jin, A phase transition coordinated monoclinic Fe-based Prussian blue for high-performance sodium-ion battery cathode, *Journal of Alloys and Compounds*, 2024, 1009, 177014.
- 49 H. Yang, H. Wang, W. Li, B. Tian, T. Xu, D. Kong, S. Huang, K. Liu, X. Li, H. Ying Yang and Y. Wang, A simple and effective host for sodium metal anode: a 3D-printed high pyrrolic-N doped graphene microlattice aerogel, *Journal of Materials Chemistry A*, 2022, 10, 16842–16852.
- 50 Y. Ouyang, W. Zong, X. Zhu, L. Mo, G. Chao, W. Fan, F. Lai, Y.-E. Miao, T. Liu and Y. Yu, A Universal Spinning-Coordinating Strategy to Construct Continuous Metal-Nitrogen-Carbon

- Heterointerface with Boosted Lithium Polysulfides Immobilization for 3D-Printed Li<sub>2</sub>S Batteries, *Advanced Science*, 2022, 9, 2203181.
- 51 V. Gupta, F. Alam, P. Verma, A. M. Kannan and S. Kumar, Additive manufacturing enabled, microarchitected, hierarchically porous polylactic-acid/lithium iron phosphate/carbon nanotube nanocomposite electrodes for high performance Li-Ion batteries, *Journal of Power Sources*, 2021, 494, 229625.
  - 52 L. Airoldi, U. Anselmi-Tamburini, B. Vigani, S. Rossi, P. Mustarelli and E. Quartarone, Additive Manufacturing of Aqueous-Processed LiMn<sub>2</sub>O<sub>4</sub> Thick Electrodes for High-Energy-Density Lithium-Ion Batteries, *Batteries & Supercaps*, 2020, 3, 1040–1050.
  - 53 A. C. Martinez, A. P. Aranzola, E. Schiaffino, E. MacDonald and A. Maurel, Additive manufacturing of LiCoO<sub>2</sub> electrodes via vat photopolymerization for lithium ion batteries, *Energy Adv.*, 2024, 3, 1009–1018.
  - 54 A. C. Martinez, A. Maurel, A. P. Aranzola, S. Grugeon, S. Panier, L. Dupont, J. A. Hernandez-Viezcas, B. Mummareddy, B. L. Armstrong, P. Cortes, S. T. Sreenivasan and E. MacDonald, Additive manufacturing of LiNi<sub>1/3</sub>Mn<sub>1/3</sub>Co<sub>1/3</sub>O<sub>2</sub> battery electrode material via vat photopolymerization precursor approach, *Sci Rep*, 2022, 12, 19010.
  - 55 M. A. Saccone, R. A. Gallivan, K. Narita, D. W. Yee and J. R. Greer, Additive manufacturing of micro-architected metals via hydrogel infusion, *Nature*, 2022, 612, 685–690.
  - 56 F. Meng, M. Zhang, J. Huang, W. F. Lu, J. M. Xue and H. Wang, Additive Manufacturing of Stable Energy Storage Devices Using a Multinozzle Printing System, *Advanced Functional Materials*, 2021, 31, 2008280.
  - 57 J. Ma, S. Zheng, F. Zhou, Y. Zhu, P. Das, R. Huang, L. Zhang, X. Wang, H. Wang, Y. Cui and Z.-S. Wu, All 3D printing lithium metal batteries with hierarchically and conductively porous skeleton for ultrahigh areal energy density, *Energy Storage Materials*, 2023, 54, 304–312.
  - 58 M. Zhang, T. Hu, X. Wang, P. Chang, Z. Jin, L. Pan, H. Mei, L. Cheng and L. Zhang, Boosting uniform charge distribution using 3D rigid electrodes with interconnected gyroid channels to achieve stable and reliable zinc-ion batteries, *J. Mater. Chem. A*, 2022, 10, 7195–7206.
  - 59 P. Viviani, E. Gibertini, F. Iervolino, M. Levi and L. Magagnin, Carbon additive effect on the electrochemical performances of inkjet printed thin-film Li<sub>4</sub>Ti<sub>5</sub>O<sub>12</sub> electrodes, *Journal of Manufacturing Processes*, 2021, 72, 411–418.
  - 60 S. Ao, Z. Guo, Y. Song, D. Fang and Y. Bao, Clog-Free, Low-Cost, and Uniform Electrode Inks for 3D Printed Lithium-Ion Batteries, *ACS Appl. Energy Mater.*, 2022, 5, 6970–6979.
  - 61 Y. Ren, F. Meng, S. Zhang, B. Ping, H. Li, B. Yin and T. Ma, CNT@MnO<sub>2</sub> composite ink toward a flexible 3D printed micro-zinc-ion battery, *Carbon Energy*, 2022, 4, 446–457.
  - 62 D. Ji, H. Zheng, H. Zhang, W. Liu and J. Ding, Coaxial 3D-printing constructing all-in-one fibrous lithium-, sodium-, and zinc-ion batteries, *Chemical Engineering Journal*, 2022, 433, 133815.
  - 63 A. C. Martinez, A. Maurel, B. Yelamanchi, A. A. Talin, S. Grugeon, S. Panier, L. Dupont, A. Aranzola, E. Schiaffino, S. T. Sreenivasan, P. Cortes and E. MacDonald, Combining 3D printing of copper current collectors and electrophoretic deposition of electrode materials for structural lithium-ion batteries, *Adv. Manuf.*, 2025, 13, 462–475.
  - 64 C. Wei, M. Tian, Z. Fan, L. Yu, Y. Song, X. Yang, Z. Shi, M. Wang, R. Yang and J. Sun, Concurrent realization of dendrite-free anode and high-loading cathode via 3D printed N-Ti<sub>3</sub>C<sub>2</sub> MXene framework toward advanced Li–S full batteries, *Energy Storage Materials*, 2021, 41, 141–151.
  - 65 X. Gao, X. Yang, Q. Sun, J. Luo, J. Liang, W. Li, J. Wang, S. Wang, M. Li, R. Li, T.-K. Sham and X. Sun, Converting a thick electrode into vertically aligned “Thin electrodes” by 3D-Printing for designing thickness independent Li–S cathode, *Energy Storage Materials*, 2020, 24, 682–688.

- 66 A. Kumarov, E. Chisom Nwaogu, A. Zhumadil, Z. Bakenov and A. Nurpeissova, Current collector-free printed three-dimensional MXene-based anodes for lithium-ion batteries, *Electrochemistry Communications*, 2023, 157, 107621.
- 67 S. Ling, X. Li, T. Zhou, R. Yuan, S. Sun, H. He and C. Zhang, Densifiable Ink Extrusion for Roll-To-Roll Fiber Lithium-Ion Batteries with Ultra-High Linear and Volumetric Energy Densities, *Advanced Materials*, 2023, 35, 2211201.
- 68 K. Xu, N. Zhao, Y. Li, P. Wang, Z. Liu, Z. Chen, J. Shen and C. Liu, Design and 3D Printing of Interdigitated Electrode Structures for High-performance Full Lithium-ion Battery, *Chinese Journal of Mechanical Engineering: Additive Manufacturing Frontiers*, 2022, 1, 100053.
- 69 J. F. Valera-Jiménez, J. C. Pérez-Flores, M. Castro-García and J. Canales-Vázquez, Development of full ceramic electrodes for lithium-ion batteries via desktop-fused filament fabrication and further sintering, *Applied Materials Today*, 2021, 25, 101243.
- 70 L. Zeng, J. He, C. Yang, D. Luo, H. Yu, H. He and C. Zhang, Direct 3D printing of stress-released Zn powder anodes toward flexible dendrite-free Zn batteries, *Energy Storage Materials*, 2023, 54, 469–477.
- 71 Y. Zhao, F. Liu, Z. Zhao, P. Bai, Y. Ma, A. Alhadhrami, G. A. M. Mersal, Z. Lin, M. M. Ibrahim and Z. M. El-Bahy, Direct ink printing reduced graphene oxide/KCu<sub>7</sub>S<sub>4</sub> electrodes for high-performance supercapacitors, *Adv Compos Hybrid Mater*, 2022, 5, 1516–1526.
- 72 L. Li, H. Tan, X. Yuan, H. Ma, Z. Ma, Y. Zhao, J. Zhao, X. Wang, D. Chen and Y. Dong, Direct ink writing preparation of LiFePO<sub>4</sub>/MWCNTs electrodes with high-areal Li-ion capacity, *Ceramics International*, 2021, 47, 21161–21166.
- 73 X. Li, S. Ling, L. Zeng, H. He, X. Liu and C. Zhang, Directional Freezing Assisted 3D Printing to Solve a Flexible Battery Dilemma: Ultrahigh Energy/Power Density and Uncompromised Mechanical Compliance, *Advanced Energy Materials*, 2022, 12, 2200233.
- 74 C. Ramírez, M. I. Osendi, J. J. Moyano, J. Mosa and M. Aparicio, Electrochemical Response of 3D-Printed Free-Standing Reduced Graphene Oxide Electrode for Sodium Ion Batteries Using a Three-Electrode Glass Cell, *Materials*, DOI:10.3390/ma16155386.
- 75 D. B. Ahn, W.-Y. Kim, K.-H. Lee, S.-S. Lee, S.-H. Kim, S. Park, Y.-K. Hong and S.-Y. Lee, Enabling On-Demand Conformal Zn-Ion Batteries on Non-Developable Surfaces, *Advanced Functional Materials*, 2023, 33, 2211597.
- 76 T. Chen, Y. Wang, Y. Yang, F. Huang, M. Zhu, B. T. W. Ang and J. M. Xue, Heterometallic Seed-Mediated Zinc Deposition on Inkjet Printed Silver Nanoparticles Toward Foldable and Heat-Resistant Zinc Batteries, *Advanced Functional Materials*, 2021, 31, 2101607.
- 77 B. Yu, Y. Ji, X. Hu, Y. Liu, J. Yuan, S. Lei, G. Zhong, Z. Weng, H. Zhan and Z. Wen, Heterostructured Cu<sub>2</sub>S@ZnS/C composite with fast interfacial reaction kinetics for high-performance 3D-printed Sodium-Ion batteries, *Chemical Engineering Journal*, 2022, 430, 132993.
- 78 W. Gao, J. Michalička and M. Pumera, Hierarchical Atomic Layer Deposited V<sub>2</sub>O<sub>5</sub> on 3D Printed Nanocarbon Electrodes for High-Performance Aqueous Zinc-Ion Batteries, *Small*, 2022, 18, 2105572.
- 79 J. Yuan, M. Qiu, J. X. Chen, X. Hu, Y. Liu, B. Yu, G. Zhong, Z. Weng, H. Zhan and Z. Wen, High Mass Loading 3D-Printed Sodium-Ion Hybrid Capacitors, *Advanced Functional Materials*, 2022, 32, 2203732.
- 80 S. Park, Z. Cao, D. H. Sung and K. K. Fu, High-Loaded Electrode Filaments for Additive Manufacturing of Structural Batteries, *Advanced Energy Materials*, 2023, 13, 2301704.
- 81 C. Liu, N. Zhao, K. Xu, Y. Li, J. P. Mwizerwa, J. Shen and Z. Chen, High-performance LiFePO<sub>4</sub> and SiO<sub>2</sub>@C/graphite interdigitated full lithium-ion battery fabricated via low temperature direct write 3D printing, *Materials Today Energy*, 2022, 29, 101098.
- 82 J. Bae, S. Oh, B. Lee, C. H. Lee, J. Chung, J. Kim, S. Jo, S. Seo, J. Lim and S. Chung, High-performance, printable quasi-solid-state electrolytes toward all 3D direct ink writing of shape-versatile Li-ion batteries, *Energy Storage Materials*, 2023, 57, 277–288.

- 83 D. W. Yee, M. A. Citrin, Z. W. Taylor, M. A. Saccone, V. L. Tovmasyan and J. R. Greer, Hydrogel-based Additive Manufacturing of Lithium Cobalt Oxide, *Adv Mater Technol*, 2021, 6, 2000791.
- 84 Y. Li, Y. Wang, Y. Liu, Z. Lin, Z. Ye, J. Wang, J. Qiu, H. Zhang and G. Cao, In-situ interface reinforcement for 3D printed fiber electrodes, *Energy Storage Materials*, 2023, 57, 497–507.
- 85 A. Kushwaha, M. K. Jangid, B. B. Bhatt, A. Mukhopadhyay and D. Gupta, Inkjet-Printed Environmentally Friendly Graphene Film for Application as a High-Performance Anode in Li-Ion Batteries, *ACS Appl. Energy Mater.*, 2021, 4, 7911–7921.
- 86 Y. Liu, H. Wang, H. Yang, Z. Wang, Z. Huang, D. Pan, Z. Zhang, Z. Duan, T. Xu, D. Kong, X. Li, Y. Wang and J. Sun, Longevous Sodium Metal Anodes with High Areal Capacity Enabled by 3D-Printed Sodiophilic Monoliths, *ACS Nano*, 2023, 17, 10844–10856.
- 87 F. Zhang, Z. Li, T. Cao, K. Qin, Q. Xu, H. Liu and Y. Xia, Multishelled Ni<sub>2</sub>P Microspheres as Multifunctional Sulfur Host 3D-Printed Cathode Materials Ensuring High Areal Capacity of Lithium–Sulfur Batteries, *ACS Sustainable Chem. Eng.*, 2021, 9, 6097–6106.
- 88 C. Liu, Y. Qiu, Y. Liu, K. Xu, N. Zhao, C. Lao, J. Shen and Z. Chen, Novel 3D grid porous Li<sub>4</sub>Ti<sub>5</sub>O<sub>12</sub> thick electrodes fabricated by 3D printing for high performance lithium-ion batteries, *J Adv Ceram*, 2022, 11, 295–307.
- 89 G. Qi, H. Yao, Y. Zeng and J. Chen, Preparation and properties of highly loaded SnO<sub>2</sub>-based porous electrodes by DLP 3D printing, *Journal of Alloys and Compounds*, 2023, 935, 167941.
- 90 B. Yao, H. Peng, H. Zhang, J. Kang, C. Zhu, G. Delgado, D. Byrne, S. Faulkner, M. Freyman, X. Lu, M. A. Worsley, J. Q. Lu and Y. Li, Printing Porous Carbon Aerogels for Low Temperature Supercapacitors, *Nano Lett*, 2021, 21, 3731–3737.
- 91 M. Zheng, X. Gao, Y. Sun, K. Adair, M. Li, J. Liang, X. Li, J. Liang, S. Deng, X. Yang, Q. Sun, Y. Hu, Q. Xiao, R. Li and X. Sun, Realizing High-Performance Li-S Batteries through Additive Manufactured and Chemically Enhanced Cathodes, *Small Methods*, 2021, 5, 2100176.
- 92 H. Yang, Y. Wan, K. Sun, M. Zhang, C. Wang, Z. He, Q. Li, N. Wang, Y. Zhang, H. Hu and M. Wu, Reconciling Mass Loading and Gravimetric Performance of MnO<sub>2</sub> Cathodes by 3D-Printed Carbon Structures for Zinc-Ion Batteries, *Advanced Functional Materials*, 2023, 33, 2215076.
- 93 U. Gulzar, V. Egorov, Y. Zhang and C. O’Dwyer, Recyclable 3D-Printed Aqueous Lithium-Ion Battery, *Advanced Energy and Sustainability Research*, 2023, 4, 2300029.
- 94 G. J. H. Lim, Z. Lyu, X. Zhang, J. J. Koh, Y. Zhang, C. He, S. Adams, J. Wang and J. Ding, Robust pure copper framework by extrusion 3D printing for advanced lithium metal anodes, *J. Mater. Chem. A*, 2020, 8, 9058–9067.
- 95 V. Boudeville, S. Grugeon, A. Maurel, R. Lesieur, M. Louati, A. Cayla, S. Ursescu, C. Campagne, S. Panier and L. Dupont, Solvent-free extrusion of a LiFePO<sub>4</sub>-based monofilament for three-dimensional printing of a lithium-ion battery positive electrode, *Journal of Power Sources*, 2024, 593, 233973.
- 96 E. Redondo, S. Ng, J. Muñoz and M. Pumera, Tailoring capacitance of 3D-printed graphene electrodes by carbonisation temperature, *Nanoscale*, 2020, 12, 19673–19680.
- 97 J. Pierre Mwizerwa, C. Liu, K. Xu, N. Zhao, Y. Li, Z. Chen and J. Shen, Three-dimensional printed lithium iron phosphate coated with magnesium oxide cathode with improved areal capacity and ultralong cycling stability for high performance lithium-ion batteries, *Journal of Colloid and Interface Science*, 2022, 623, 168–181.
- 98 W. Zong, H. Guo, Y. Ouyang, L. Mo, C. Zhou, G. Chao, J. Hofkens, Y. Xu, W. Wang, Y.-E. Miao, G. He, I. P. Parkin, F. Lai and T. Liu, Topochemistry-Driven Synthesis of Transition-Metal Selenides with Weakened Van Der Waals Force to Enable 3D-Printed Na-Ion Hybrid Capacitors, *Advanced Functional Materials*, 2022, 32, 2110016.

- 99 J. Qian, Q. Chen, M. Hong, W. Xie, S. Jing, Y. Bao, G. Chen, Z. Pang, L. Hu and T. Li, Toward stretchable batteries: 3D-printed deformable electrodes and separator enabled by nanocellulose, *Materials Today*, 2022, 54, 18–26.
- 100 X. Wang, M. Zhang, H. Mei, P. Chang and L. Cheng, Ultra-pressure-resistant SiOC@Cu<sub>2</sub>Se 3D printed cathode for aqueous zinc-ion batteries, *Ceramics International*, 2021, 47, 24699–24706.
- 101 D. Pan, H. Yang, Y. Liu, H. Wang, T. Xu, D. Kong, J. Yao, Y. Shi, X. Li, H. Y. Yang and Y. Wang, Ultrahigh areal capacity and long cycling stability of sodium metal anodes boosted using a 3D-printed sodiophilic MXene/rGO microlattice aerogel, *Nanoscale*, 2023, 15, 17482–17493.
- 102 M. A. Saccone and J. R. Greer, Understanding and mitigating mechanical degradation in lithium–sulfur batteries: additive manufacturing of Li<sub>2</sub>S composites and nanomechanical particle compressions, *Journal of Materials Research*, 2021, 36, 3656–3666.
- 103 M. Li, S. Zhou, L. Cheng, W. Ren, L. Chen, S. Yu and J. Wei, Vertical-channel hierarchically porous 3D printed electrodes with ultrahigh mass loading and areal energy density for Li-ion batteries, *Energy Storage Materials*, 2024, 72, 103754.
